# Supplementary material for: A novel temperature-responsive electrochemical sensing platform for reversible switch-sensitive detection of acetamidophenol
Source: Royal Society of Chemistry journal article supplement (doi:10.1039/d2ay01280d), 2022-01-01
Supplement: d2ay01280d1.pdf [file d2ay01280d1.pdf]

# A Novel Temperature-responsive Electrochemical Sensing Platform for Reversible Switch-Sensitive Detection of Acetamidophenol

Chao Chen<sup>a,c\*</sup>, Chenxi Wang<sup>b,c</sup>, Pengcheng Zhao<sup>c,d</sup>, Jin Zhang<sup>a</sup>, Yongjun Hu<sup>a\*</sup>, Junjie Fei<sup>c\*</sup>

<sup>a</sup> School of Materials and Chemical Engineering, Hunan City University, Yiyang 413000, People's Republic of China

<sup>b</sup> Key Laboratory of Environmentally Friendly Chemistry and Applications of Ministry of Education, College of Chemistry, Xiangtan University, Xiangtan 411105, People's Republic of China

<sup>c</sup> Hunan Institute of Advanced Sensing and Information Technology, Xiangtan University, Xiangtan 411105, People's Republic of China

<sup>d</sup> Key Laboratory for Green Organic Synthesis and Application of Hunan Province, Xiangtan University, Xiangtan 411105, People's Republic of China

\* Chao Chen, Ph.D., School of Materials and Chemical Engineering, Hunan City University, Yiyang, China

E-mail: [chenciaohncu@qq.com](mailto:chenciaohncu@qq.com)

\* Junjie Fei, Ph.D., College of Chemistry, Xiangtan University, Xiangtan, China

E-mail: [fei\\_junjie@xtu.edu.cn](mailto:fei_junjie@xtu.edu.cn)

\* Yongjun Hu, Ph.D., School of Materials and Chemical Engineering, Hunan City University, Yiyang, China

E-mail: [416064395@qq.com](mailto:416064395@qq.com)

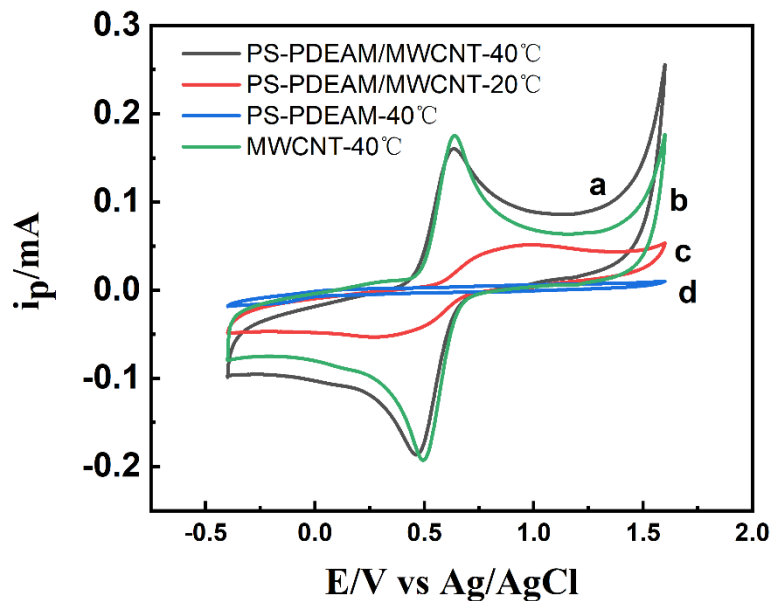

Fig.S1 Cyclic voltammogram of (a)PS-PDEAM/MWCNTs,(c)PS-PDEAM, (d)MWCNTs at 40°C and (b)PS-PDEAM /MWCNTs at 20°C in 5 mM  $K_3Fe(CN)_6/K_4Fe(CN)_6$  solutions.

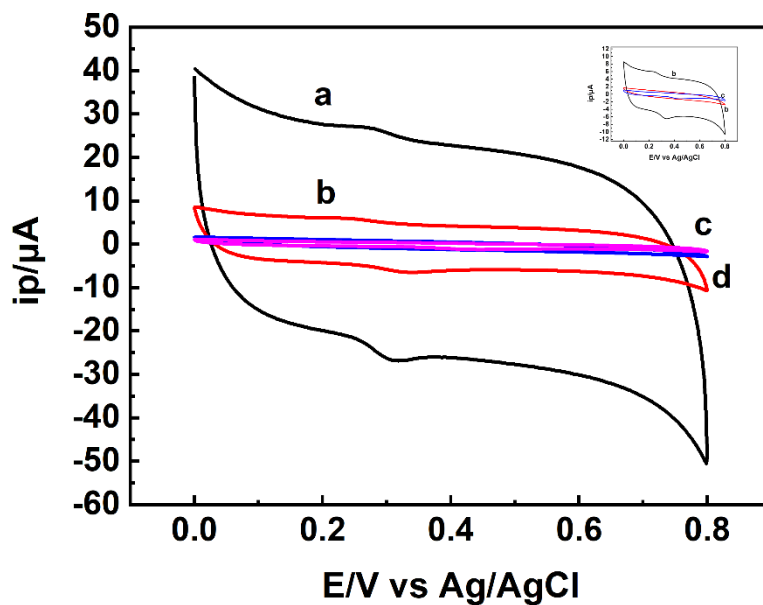

Fig.S2 Cyclic voltammogram of (a) MWCNTs, (b) PS-PDEAM /MWCNTs (c) bare GCE, (d) PS-PDEAM with 30  $\mu$ M AP, Solution temperature: 40°C. Inset shows the enlarged view of (b) (c) and (d).

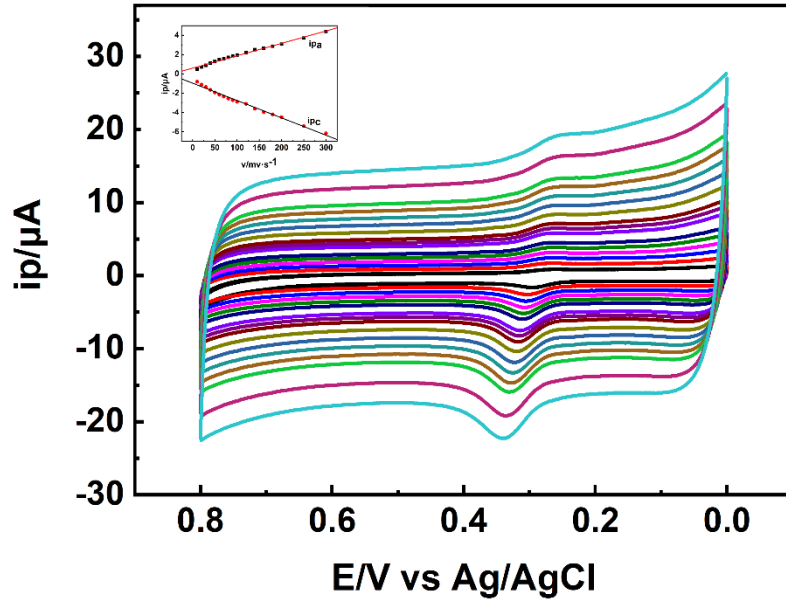

Fig.S3 CV of 30  $\mu\text{M}$  AP at the PS-PDEAM /MWCNTs at different scan rates (from 10, 20, 30, 40, 50, 60, 70, 80, 90, 100, 120, 140, 160, 180, 200, 250 to 300  $\text{mV}\cdot\text{s}^{-1}$  in 0.1 M PBS (pH 7.0). Testing temperature: 40°C. Inset: The dependence of redox peak currents on the scan rates

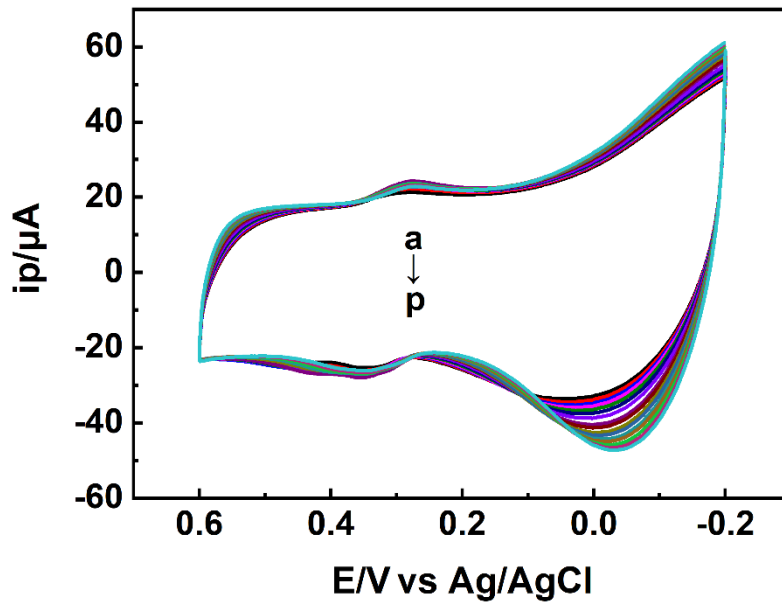

Fig.S4 Temperature-dependent CVs of AP at the MWCNTs electrode from a to p: 10 to 40°C. Concentration of AP: 30  $\mu\text{M}$

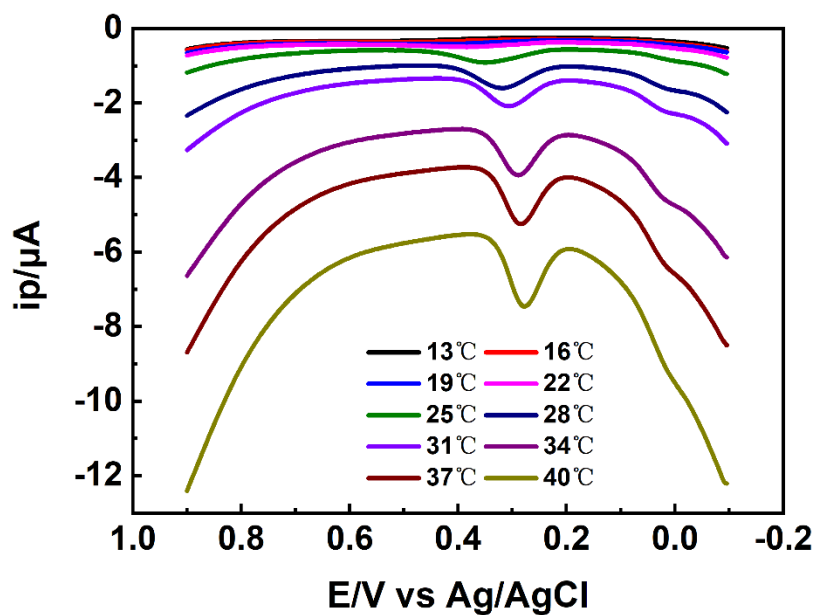

Fig.S5 Differential pulse voltammetry of AP at PS-PDEAM/MWCNTs modified electrodes in 0.1 M PBS (pH 7.0) toward temperature stimuli from 13 to 40°C.

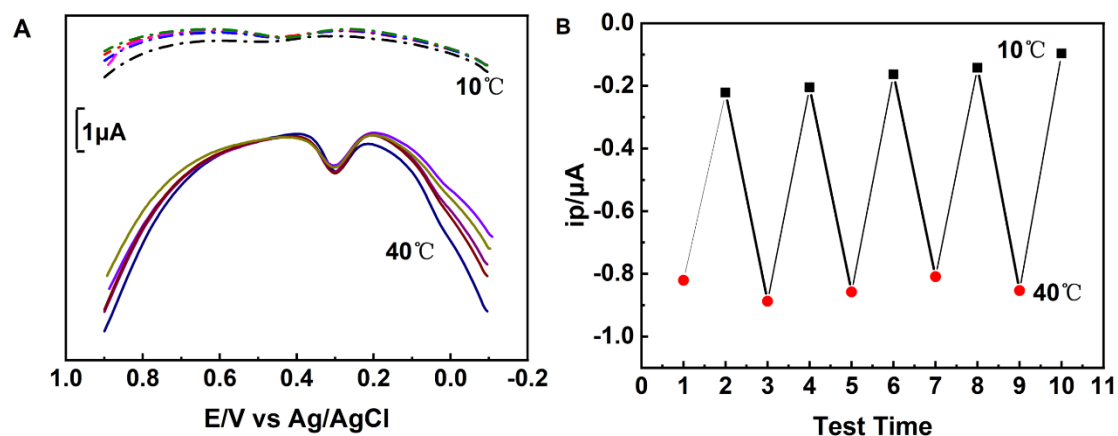

Fig.S6 (A) Reproducible switching "on-off" DPV of AP at the PS-PDEAM/MWCNTs electrode in 0.1 mol·L<sup>-1</sup> PBS solution between 10°C and 40°C, Concentration of AP: 20 μM. (B) The dependence of DPV's  $I_p$  on solution temperature is switched between 40°C (●) and 10°C (■).
